# Supplementary material for: Novel Cytochrome P450, cyp6a17, Is Required for Temperature Preference Behavior in Drosophila
Source: PubMed Central journal article supplement (PMC3247289; doi:10.1371/journal.pone.0029800), 2011-12-28

Supporting Information Figure 1

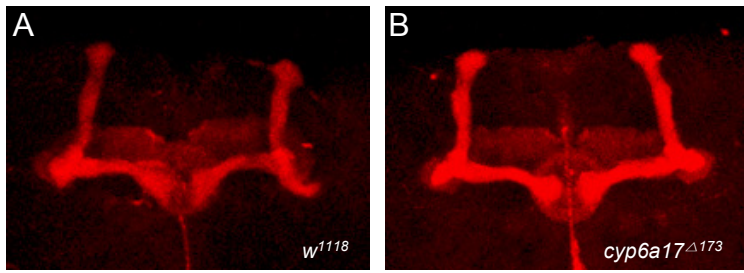

Supplement: pone.0029800.s001.pdf [file pone.0029800.s001.pdf]
