# Supplementary material for: Novel Cytochrome P450, cyp6a17, Is Required for Temperature Preference Behavior in Drosophila
Source: PubMed Central journal article supplement (PMC3247289; doi:10.1371/journal.pone.0029800), 2011-12-28
Supplement: pone.0029800.s004.pdf [file pone.0029800.s004.pdf]

Supporting Table 1. Total list of the 103 probes.

| Gene Symbol    | Fold value more than 2 compare with control              |                                                          | Functional category                            |
|----------------|----------------------------------------------------------|----------------------------------------------------------|------------------------------------------------|
|                | MB247; tub-Gal80 <sup>IS</sup><br>>UAS-PKA <sup>DN</sup> | MB247; tub-Gal80 <sup>IS</sup><br>>UAS-PKA <sup>CA</sup> |                                                |
| CG4650         | 0.05462545                                               | 0.18353308                                               | Proteolysis                                    |
| CG13646        | 0.38492279                                               | 0.33395972                                               | Amino acid transport                           |
| CG7763         | 0.37176426                                               | 0.33785872                                               | N/A                                            |
| CG8713         | 0.17261539                                               | 0.34251213                                               | Potassium ion transport                        |
| CG8193         | 0.38644473                                               | 0.37035790                                               | Oxygen transporter                             |
| Bc             | 0.32859148                                               | 0.39365999                                               | Melanization defense response                  |
| CG7738         | 0.45168221                                               | 0.42349006                                               | N/A                                            |
| Eip74EF        | 0.35456597                                               | 0.47670544                                               | Transcription factor                           |
| CG11852        | 2.06968183                                               | 2.04899718                                               | N/A                                            |
| Acp1 (CG31904) | 3.12055794                                               | 2.08231164                                               | Structural constituent of adult cuticle        |
| p38c           | 2.09828406                                               | 2.43528395                                               | MAP kinase                                     |
| CG32850        | 2.07906087                                               | 2.44630621                                               | Zinc ion binding                               |
| CG7214         | 3.52039424                                               | 2.69286704                                               | Regulation of NFAT                             |
| Cyp6a17        | 0.20840532                                               | 3.03124613                                               | Monoxygenase                                   |
| CG31685        | 3.03643187                                               | 3.11841298                                               | N/A                                            |
| CG10924        | 4.58314522                                               | 4.86540533                                               | Gluconeogenesis                                |
| CG11893        | 9.92378858                                               | 7.62364531                                               | N/A                                            |
| CG2177         | 10.06949900                                              | 10.55403670                                              | Metal ion transport                            |
| Transposon.32  | 6.56581454                                               | 14.01341819                                              | Transposon                                     |
| Transposon.17  | 8.91080024                                               | 14.91172237                                              | Transposon                                     |
| path           | 0.23115653                                               | 1.16722040                                               | Regulation of growth                           |
| CG31038        | 0.26355738                                               | 1.70542700                                               | N/A                                            |
| CR31614        | 0.28676304                                               | 0.54815432                                               | N/A                                            |
| CG33296        | 0.29712584                                               | 0.65189703                                               | Neurotransmitter transport                     |
| CG9512         | 0.35926966                                               | 0.65928310                                               | Alcohol metabolic process                      |
| CG31809        | 0.40768337                                               | 0.75573639                                               | Steroid metabolic process                      |
| pgant4         | 0.43227970                                               | 0.52068365                                               | Polypeptide N-acetylgalactosaminyl transferase |
| regucalcin     | 0.43480216                                               | 0.79394667                                               | Lipid particle                                 |
| TotA           | 0.44192701                                               | 0.88571840                                               | Response to stress                             |
| CG2781         | 0.44634557                                               | 0.99414693                                               | Fatty acid elongation                          |
| HDC07874       | 0.46297494                                               | 0.69483484                                               | RNAi reagent                                   |
| Amph           | 0.46755857                                               | 1.04774018                                               | Neurotransmitter secretion                     |
| Os-C           | 0.47353468                                               | 0.53434707                                               | Pheromone binding                              |
| CG32364        | 0.47360723                                               | 0.56594745                                               | Nucleic acid binding                           |
| CG3513         | 2.07621234                                               | 1.23572096                                               | Endopeptidase inhibitor                        |
| Cyp9c1         | 2.08830871                                               | 0.85557071                                               | Monoxygenase                                   |
| Ssl2           | 2.09409806                                               | 0.87558309                                               | Strictosidine synthase                         |
| Rab2           | 2.13104639                                               | 1.04633440                                               | GTPase                                         |
| Edg91          | 2.19929632                                               | 1.07025902                                               | Structural constituent of pupal cuticle        |
| Def            | 2.20113861                                               | 0.96875382                                               | Defense response to bacterium                  |
| CG8012         | 2.22890789                                               | 1.61419067                                               | N/A                                            |
| CecC           | 2.23797667                                               | 0.87502128                                               | Defense response to bacterium                  |
| CG33868        | 2.28082854                                               | 1.57578969                                               | Chromatin remodeling                           |
| $\alpha$ -Est2 | 2.35839603                                               | 1.60646105                                               | Carboxylesterase                               |
| neb            | 2.40444012                                               | 0.93318434                                               | Chromosome segregation                         |
| Su(var)3-3     | 2.45636849                                               | 1.68926071                                               | Histone demethylation                          |
| CG5172         | 2.52585006                                               | 1.00000000                                               | N/A                                            |
| Cyp6a8         | 2.56855862                                               | 0.78826521                                               | Insecticide metabolic process                  |
| CG8539         | 2.59846387                                               | 1.37374097                                               | Proteolysis                                    |
| CG14221        | 2.68433923                                               | 1.79533616                                               | Cell redox homeostasis                         |
| AttC           | 2.75668419                                               | 1.68841787                                               | Antibacterial humoral response                 |
| dro4           | 2.76519649                                               | 0.84640145                                               | Defense response to fungus                     |
| Glut1          | 3.20877360                                               | 0.91934483                                               | Regulation of cell cycle                       |
| CG1942         | 3.39646738                                               | 1.31813305                                               | Mesoderm development                           |
| CG17567        | 3.46586870                                               | 1.00952735                                               | N/A                                            |
| DptB           | 3.75399050                                               | 1.66270243                                               | Antibacterial humoral response                 |
| CG32594        | 4.14788817                                               | 1.57232342                                               | N/A                                            |

Supporting Table 1. Total list of the 103 probes. (continued)

| Gene Symbol           | Fold value more than 2 compare with control              |                                                          | Functional category                     |
|-----------------------|----------------------------------------------------------|----------------------------------------------------------|-----------------------------------------|
|                       | MB247; tub-Gal80 <sup>ts</sup><br>>UAS-PKA <sup>DN</sup> | MB247; tub-Gal80 <sup>ts</sup><br>>UAS-PKA <sup>CA</sup> |                                         |
| Snoo                  | 4.18018560                                               | 0.97805873                                               | Neuron development                      |
| dro5                  | 4.25088138                                               | 0.88446012                                               | Defense response to fungus              |
| CG10148               | 4.44437022                                               | 0.91550204                                               | Protein binding                         |
| AttA                  | 11.38347400                                              | 1.20780370                                               | Antibacterial humoral response          |
| AttB                  | 12.10004913                                              | 1.56159896                                               | Antibacterial humoral response          |
| CG5246                | 14.87449723                                              | 1.45160507                                               | Proteolysis                             |
| mthl6                 | 27.13174625                                              | 1.30304237                                               | G-protein coupled receptor              |
| Cyp4g1                | 0.68625373                                               | 0.14760311                                               | Lipid metabolic process                 |
| CG4757                | 0.79106053                                               | 0.31502146                                               | Carboxylesterase                        |
| Cyp12d1-d (Cyp12d1-p) | 1.14747363                                               | 0.32020528                                               | Monooxygenase                           |
| CG18343               | 1.62984639                                               | 0.33558822                                               | N/A                                     |
| Cyp6a2                | 1.07802677                                               | 0.35180186                                               | Response to caffeine and insecticide    |
| CG6234                | 0.56344160                                               | 0.37776816                                               | N/A                                     |
| CG13022               | 1.20618316                                               | 0.38462595                                               | N/A                                     |
| CG18673               | 1.65334638                                               | 0.39260569                                               | Carbonate dehydratase                   |
| CG13091               | 0.63889422                                               | 0.39279651                                               | Metabolic process                       |
| CG13428               | 0.56814024                                               | 0.40542698                                               | N/A                                     |
| CG4446                | 0.77331227                                               | 0.40591709                                               | N/A                                     |
| CG3790                | 0.59197945                                               | 0.42939938                                               | Carnitine transporter                   |
| e                     | 0.57661809                                               | 0.44989742                                               | $\beta$ -alanyl-dopamine synthase       |
| CG40485               | 1.40489859                                               | 0.45862058                                               | Oxidoreductase                          |
| CG6639                | 1.04399587                                               | 0.46297558                                               | Proteolysis                             |
| CG31809               | 0.50393061                                               | 0.46758936                                               | Steroid metabolic process               |
| CG7194                | 1.20777189                                               | 2.01424476                                               | Gonad development                       |
| Obp83cd               | 1.12733946                                               | 2.02309771                                               | Sensory perception of chemical stimulus |
| CG33640               | 1.01327376                                               | 2.02588180                                               | N/A                                     |
| CG9837                | 1.15903168                                               | 2.04624515                                               | N/A                                     |
| Ugt37c1               | 1.38855180                                               | 2.04678703                                               | Glucuronosyltransferase                 |
| llp5                  | 1.24536617                                               | 2.11140304                                               | Insulin receptor signaling pathway      |
| copiaGIP              | 1.30491877                                               | 2.13132411                                               | DNA integration                         |
| Lsp1 $\beta$          | 1.25239530                                               | 2.13392578                                               | Nutrient reservoir                      |
| Transposon.35         | 1.46128340                                               | 2.16903450                                               | Transposon                              |
| CG31157               | 0.98758033                                               | 2.31018278                                               | N/A                                     |
| CG8757                | 0.97552517                                               | 2.32367290                                               | Oxidation reduction                     |
| CG17189               | 1.16356112                                               | 2.32393546                                               | N/A                                     |
| CG11425               | 1.32017392                                               | 2.41124626                                               | Phosphatidate phosphatase               |
| MtnD                  | 1.09222342                                               | 2.41458793                                               | Metal ion binding                       |
| CG13641               | 1.22003286                                               | 2.47338530                                               | N/A                                     |
| Obp99a                | 1.76759653                                               | 2.47462342                                               | Response to pheromone                   |
| CG10962               | 1.54358080                                               | 2.53717143                                               | Oxidation reduction                     |
| Transposon.39         | 0.97334692                                               | 2.58391390                                               | Transposon                              |
| ninaD                 | 0.70583310                                               | 2.71650744                                               | Phototransduction                       |
| CG10962               | 1.58207281                                               | 2.77948000                                               | Oxidation reduction                     |
| Prx2540-2             | 1.81008695                                               | 2.98099096                                               | Hydrogen peroxide catabolic process     |
| Transposon.75         | 1.73781198                                               | 4.24100740                                               | Transposon                              |
| Hsc70-2               | 1.03142291                                               | 4.93773017                                               | Response to heat                        |

Red indicates up-regulation in the experimental sample, and blue represents down-regulation compare to control transgenic flies (*MB247-Gal4; tub-Gal80<sup>ts</sup>/+*). N/A means not available.
