# Supplementary material for: Novel Cytochrome P450, cyp6a17, Is Required for Temperature Preference Behavior in Drosophila
Source: PubMed Central journal article supplement (PMC3247289; doi:10.1371/journal.pone.0029800), 2011-12-28
Supplement: pone.0029800.s005.pdf [file pone.0029800.s005.pdf]

Supporting Table 2. Statistical analysis of the results shown in Figures.

| Figure | Genotype                                                                     | N(n)      | Average temperature(°C)<br>± SD | Comparing with control    |                      |                            |                       |
|--------|------------------------------------------------------------------------------|-----------|---------------------------------|---------------------------|----------------------|----------------------------|-----------------------|
|        |                                                                              |           |                                 | A <sub>Low</sub> ± s.e.m. | P[A <sub>Low</sub> ] | A <sub>High</sub> ± s.e.m. | P[A <sub>High</sub> ] |
| 2C     | <i>w<sup>1118</sup></i>                                                      | 21 (1001) | 25.2 ± 0.3                      | 0.9860 ± 0.01             | control              | 0.8564 ± 0.03              | control               |
|        | <i>cyp6a17<sup>rev</sup></i>                                                 | 17(749)   | 25.0 ± 0.5                      | 0.8882 ± 0.04             |                      | 0.8397 ± 0.03              |                       |
|        | <i>cyp6a17<sup>Δ173</sup></i>                                                | 17 (719)  | 24.1 ± 2.0                      | 0.5612 ± 0.06             | **                   | 0.9042 ± 0.03              |                       |
| 2D     | <i>w<sup>1118</sup></i>                                                      | 16 (754)  | 25.1 ± 0.3                      | 0.9270 ± 0.03             | control              | 0.8564 ± 0.03              | control               |
|        | <i>cyp6a17<sup>GR</sup></i>                                                  | 17 (1023) | 25.1 ± 0.6                      | 0.9270 ± 0.02             |                      | 0.7856 ± 0.04              |                       |
|        | <i>cyp6a17<sup>Δ173</sup></i>                                                | 17 (719)  | 24.1 ± 2.0                      | 0.5612 ± 0.06             | **                   | 0.9042 ± 0.03              |                       |
|        | <i>cyp6a17<sup>Δ173</sup>; cyp6a17<sup>GR</sup></i>                          | 16 (666)  | 24.8 ± 0.5                      | 0.8751 ± 0.03             |                      | 0.8408 ± 0.05              |                       |
| 3F     | <i>w<sup>1118</sup></i>                                                      | 18 (828)  | 24.8 ± 0.4                      | 0.8926 ± 0.03             | control              | 0.9026 ± 0.03              | control               |
|        | <i>cyp6a17<sup>Δ173</sup></i>                                                | 17 (719)  | 24.1 ± 2.0                      | 0.5612 ± 0.06             | **                   | 0.9042 ± 0.03              |                       |
|        | <i>cyp6a17<sup>Δ173</sup>; cyp6a17<sup>MB</sup>-Gal4<br/>&gt;UAS-cyp6a17</i> | 15 (579)  | 25.1 ± 0.6                      | 0.9005 ± 0.03             |                      | 0.7377 ± 0.03              | **                    |
| 4A     | <i>w<sup>1118</sup></i>                                                      | 15 (723)  | 25.2 ± 0.3                      | 0.9724 ± 0.01             | control              | 0.9656 ± 0.01              | control               |
|        | <i>Elav-Gal4/+</i>                                                           | 24 (1071) | 24.8 ± 0.6                      | 0.8333 ± 0.04             |                      | 0.9453 ± 0.01              |                       |
|        | <i>cyp6a17-RNAi/+</i>                                                        | 18 (783)  | 25.1 ± 0.7                      | 0.8827 ± 0.03             |                      | 0.8655 ± 0.03              | *                     |
|        | <i>Elav&gt;cyp6a17-RNAi</i>                                                  | 21 (952)  | 23.7 ± 1.6                      | 0.2181 ± 0.08             | **                   | 0.8967 ± 0.03              |                       |
| 4B     | <i>w<sup>1118</sup></i>                                                      | 16(723)   | 24.7 ± 0.4                      | 0.8813 ± 0.03             | control              | 0.9193 ± 0.03              | control               |
|        | <i>c290-Gal4/+</i>                                                           | 15 (555)  | 24.9 ± 0.5                      | 0.9243 ± 0.03             |                      | 0.8132 ± 0.04              |                       |
|        | <i>cyp6a17-RNAi/+</i>                                                        | 18 (783)  | 25.1 ± 0.7                      | 0.8827 ± 0.03             |                      | 0.8655 ± 0.03              |                       |
|        | <i>c290-Gal4&gt;cyp6a17-RNAi</i>                                             | 15 (549)  | 24.6 ± 0.4                      | 0.9080 ± 0.03             |                      | 0.9207 ± 0.03              |                       |
| 4C     | <i>w<sup>1118</sup></i>                                                      | 16 (723)  | 24.7 ± 0.4                      | 0.8813 ± 0.03             | control              | 0.9193 ± 0.03              | control               |
|        | <i>EB-Gal4/+</i>                                                             | 21 (1020) | 25.1 ± 0.4                      | 0.8537 ± 0.04             |                      | 0.9142 ± 0.02              |                       |
|        | <i>cyp6a17-RNAi/+</i>                                                        | 18 (783)  | 25.1 ± 0.7                      | 0.8827 ± 0.03             |                      | 0.8655 ± 0.03              |                       |
|        | <i>EB-Gal4&gt;cyp6a17-RNAi</i>                                               | 20 (704)  | 24.8 ± 0.5                      | 0.8977 ± 0.02             |                      | 0.8533 ± 0.02              |                       |
| 4D     | <i>w<sup>1118</sup></i>                                                      | 16(723)   | 24.7 ± 0.4                      | 0.8813 ± 0.03             | control              | 0.9193 ± 0.03              | control               |
|        | <i>PI-Gal4/+</i>                                                             | 15 (596)  | 24.8 ± 0.5                      | 0.8952 ± 0.03             |                      | 0.9315 ± 0.02              |                       |
|        | <i>cyp6a17-RNAi/+</i>                                                        | 18 (783)  | 25.1 ± 0.7                      | 0.8827 ± 0.03             |                      | 0.8655 ± 0.03              |                       |
|        | <i>PI-Gal4&gt;cyp6a17-RNAi</i>                                               | 16 (685)  | 24.8 ± 0.5                      | 0.9187 ± 0.02             |                      | 0.8375 ± 0.03              |                       |

One way ANOVA followed by Dunnett's tests were performed. N, Number of testes. n, number of flies tested. SD, standard deviation, s.e.m., standard error. One asterisks,  $P < 0.005$  and two asterisks,  $P < 0.001$ .

Supporting Table 2. Statistical analysis of the results shown in Figures (continued).

| Figure | Genotype                                               | N(n)      | Average temperature(°C)<br>± SD | Comparing with control     |                       |                             |                        |
|--------|--------------------------------------------------------|-----------|---------------------------------|----------------------------|-----------------------|-----------------------------|------------------------|
|        |                                                        |           |                                 | AI <sub>Low</sub> ± s.e.m. | P[AI <sub>Low</sub> ] | AI <sub>High</sub> ± s.e.m. | P[AI <sub>High</sub> ] |
| 5A     | <i>w<sup>1118</sup></i>                                | 28 (1350) | 25.0 ± 0.2                      | 0.9270 ± 0.03              | control               | 0.8178 ± 0.04               | control                |
|        | <i>cyp6a17<sup>MB</sup>-Gal4/+</i>                     | 21 (832)  | 24.7 ± 0.8                      | 0.8234 ± 0.03              |                       | 0.7985 ± 0.03               |                        |
|        | <i>cyp6a17-RNAi/+</i>                                  | 18 (783)  | 25.1 ± 0.7                      | 0.8827 ± 0.03              |                       | 0.8655 ± 0.03               |                        |
|        | <i>cyp6a17<sup>MB</sup>-Gal4&gt;cyp6a17-RNAi</i>       | 23 (1100) | 23.9 ± 3.2                      | 0.1057 ± 0.07              | **                    | 0.5742 ± 0.07               | **                     |
| 5B     | <i>w<sup>1118</sup></i>                                | 28 (956)  | 25.0 ± 0.4                      | 0.9270 ± 0.02              | control               | 0.8707 ± 0.02               | control                |
|        | <i>MB247/+</i>                                         | 23 (854)  | 24.6 ± 0.6                      | 0.7917 ± 0.04              |                       | 0.9716 ± 0.01               | *                      |
|        | <i>cyp6a17-RNAi/+</i>                                  | 18 (783)  | 25.1 ± 0.7                      | 0.8827 ± 0.03              |                       | 0.8655 ± 0.03               |                        |
|        | <i>MB247&gt;cyp6a17-RNAi</i>                           | 21 (736)  | 23.0 ± 2.7                      | 0.1446 ± 0.09              | **                    | 0.8874 ± 0.03               |                        |
| 5C     | <i>w<sup>1118</sup></i>                                | 18 (828)  | 24.8 ± 0.4                      | 0.8926 ± 0.03              | control               | 0.9026 ± 0.03               | control                |
|        | <i>cyp6a17<sup>Δ173</sup>; MB247-Gal4/+</i>            | 16 (769)  | 23.1 ± 2.9                      | 0.1235 ± 0.11              | **                    | 0.7170 ± 0.05               | *                      |
|        | <i>cyp6a17<sup>Δ173</sup>; UAS-cyp6a17/+</i>           | 15 (691)  | 24.2 ± 2.9                      | 0.2855 ± 0.09              | **                    | 0.4812 ± 0.07               | **                     |
|        | <i>cyp6a17<sup>Δ173</sup>; MB247-Gal4 /UAS-cyp6a17</i> | 19 (956)  | 25.1 ± 0.9                      | 0.8503 ± 0.02              |                       | 0.6813 ± 0.05               | **                     |
| 6A     | <i>w<sup>1118</sup></i>                                | 24 (1093) | 25.1 ± 0.4                      | 0.8102 ± 0.03              | control               | 0.8178 ± 0.04               | control                |
|        | <i>cyp6a17<sup>SG</sup>-Gal4/+</i>                     | 16 (678)  | 25.1 ± 0.6                      | 0.7817 ± 0.05              |                       | 0.7537 ± 0.06               |                        |
|        | <i>cyp6a17-RNAi/+</i>                                  | 18 (783)  | 25.1 ± 0.7                      | 0.8827 ± 0.03              |                       | 0.8655 ± 0.03               |                        |
|        | <i>cyp6a17<sup>SG</sup>-Gal4&gt;cyp6a17-RNAi</i>       | 20 (840)  | 24.7 ± 1.0                      | 0.7846 ± 0.05              |                       | 0.7770 ± 0.06               |                        |
| 6B     | <i>w<sup>1118</sup></i>                                | 14 (682)  | 25.0 ± 0.4                      | 0.9646 ± 0.02              | control               | 0.8508 ± 0.03               | control                |
|        | <i>OK107-Gal4/+</i>                                    | 18 (944)  | 24.8 ± 0.5                      | 0.8943 ± 0.04              |                       | 0.9027 ± 0.03               |                        |
|        | <i>cyp6a17-RNAi/+</i>                                  | 18 (783)  | 25.1 ± 0.7                      | 0.8827 ± 0.03              |                       | 0.8655 ± 0.03               |                        |
|        | <i>OK107&gt;cyp6a17-RNAi</i>                           | 21 (943)  | 23.9 ± 1.3                      | 0.3964 ± 0.10              | **                    | 0.7970 ± 0.03               |                        |
| 6C     | <i>w<sup>1118</sup></i>                                | 15 (735)  | 25.0 ± 0.4                      | 0.9670 ± 0.02              | control               | 0.8458 ± 0.03               | control                |
|        | <i>c772-Gal4/+</i>                                     | 15 (743)  | 24.8 ± 0.5                      | 0.8533 ± 0.05              |                       | 0.8303 ± 0.04               |                        |
|        | <i>cyp6a17-RNAi/+</i>                                  | 18 (783)  | 25.1 ± 0.7                      | 0.8827 ± 0.03              |                       | 0.8655 ± 0.03               |                        |
|        | <i>c772&gt;cyp6a17-RNAi</i>                            | 19 (1009) | 23.9 ± 1.5                      | 0.4251 ± 0.08              | **                    | 0.8108 ± 0.05               |                        |
| 7A     | <i>w<sup>1118</sup></i>                                | 19 (764)  | 25.1 ± 0.4                      | 0.9585 ± 0.02              | control               | 0.8359 ± 0.03               | control                |
|        | <i>MB247&gt;UAS-PKA<sup>CA</sup></i>                   | 16(737)   | 25.7 ± 1.3                      | 0.8599 ± 0.03              |                       | 0.5899 ± 0.08               | **                     |
|        | <i>UAS-PKACA, cyp6a17-RNAi/+</i>                       | 20 (846)  | 24.6 ± 7.0                      | 0.7793 ± 0.04              |                       | 0.8774 ± 0.03               |                        |
|        | <i>MB247&gt;UAS-PKA<sup>CA</sup> cyp6a17-RNAi/+</i>    | 22 (1057) | 22.2 ± 3.5                      | -0.0469 ± 0.12             | **                    | 0.7200 ± 0.06               |                        |

One way ANOVA followed by Dunnett's tests were performed. N, Number of testes. n, number of flies tested. SD, standard deviation, s.e.m., standard error. One asterisks,  $P < 0.005$  and two asterisks,  $P < 0.001$ .
